# Supplementary material for: Risk factors and clinical outcomes of extubation failure in very early preterm infants: a single-center cohort study
Source: Springer Nature journal article supplement (doi:10.1186/s12887-023-03833-5), 2023-01-21
Supplement: MOESM1 [file 23942674]

Table 1 Demographic, neonatal, maternal, and ventilation-associated data by study group before matching

| <b>Variable</b>                           | <b>Extubation failure<br/>(n=24)</b> | <b>Extubation success<br/>(n=105)</b> | <b>P<br/>value</b> |
|-------------------------------------------|--------------------------------------|---------------------------------------|--------------------|
| <b>Characteristics of neonate</b>         |                                      |                                       |                    |
| Male sex, n (%)                           | 18 (75%)                             | 58 (55.2%)                            | 0.082              |
| Gestational age, weeks, median (SD)       | 27.7 (1.4)                           | 29.8 (1.7)                            | 0.000              |
| Birth weight, grams, median (SD)          | 988.6 (257)                          | 1388.2 (358)                          | 0.000              |
| Intrauterine growth retardation, n (%)    | 4 (16.7%)                            | 4 (3.8%)                              | 0.034              |
| Apgar score at 1 min, median (IQR)        | 3.79 (2-5)                           | 4.54 (1-8)                            | 0.006              |
| Apgar score at 5 min, median (IQR)        | 5.71 (4-7)                           | 6.50 (3-9)                            | 0.001              |
| Surfactant use, median (IQR)              | 1.42 (1-3)                           | 1.24 (0-3)                            | 0.208              |
| Inotropic use within 7 days of age, n (%) | 22 (91.7%)                           | 55 (52.3%)                            | 0.000              |
| PDA, n (%)                                | 14 (58.3%)                           | 27 (25.7%)                            | 0.025              |
| PPHN, n (%)                               | 4 (16.7%)                            | 6 (5.7%)                              | 0.115              |
| HD of full feeding, days, median (IQR)    | 29.7 (6-70)                          | 14.2 (3-66)                           | 0.000              |
| <b>RSS</b>                                |                                      |                                       |                    |
| Birth, median (IQR)                       | 3.29 (1.55-15.00)                    | 2.50 (1.50-7.20)                      | 0.167              |
| 1 day of age, median (IQR)                | 2.87 (1.40-15.00)                    | 2.30 (0-16.0)                         | 0.208              |
| 3 days of age, median (IQR)               | 2.67 (1.27-10.50)                    | 1.90 (0-16.0)                         | 0.104              |

|                                                        |                   |                   |       |
|--------------------------------------------------------|-------------------|-------------------|-------|
| 1 week of age, median (IQR)                            | 2.50 (1.42-6.00)  | 1.13 (0-5.68)     | 0.000 |
| 2 weeks of age, median (IQR)                           | 2.51 (1.38-4.50)  | 0.88 (0-9.60)     | 0.000 |
| 3 weeks of age, median (IQR)                           | 2.54 (1.48-4.00)  | 1.47 (0-5.70)     | 0.000 |
| 4 weeks of age, median (IQR)                           | 2.92 (0-5.28)     | 0.74 (0-9.0)      | 0.000 |
| <b>Pre-extubation</b>                                  |                   |                   |       |
| HD, days, median (IQR)                                 | 25.6 (3-81)       | 13.60 (0-106)     | 0.012 |
| Corrected age, weeks, median (IQR)                     | 31.3 (26-39)      | 31.7 (27.6-41.0)  | 0.536 |
| Body weight, gram, median (IQR)                        | 1374.6 (668-3042) | 1526.8 (900-2605) | 0.240 |
| Use for the systemic steroid use for extubation, n (%) | 23 (95.8%)        | 22 (21.0%)        | 0.000 |
| pH, median (IQR)                                       | 7.32 (7.07-7.55)  | 7.37 (7.16-7.58)  | 0.017 |
| PCO <sub>2</sub> , median (IQR)                        | 42.0 (19.2-59.6)  | 36.1 (18.0-61.6)  | 0.018 |
| RSS, median (IQR)                                      | 1.88 (1.47-2.39)  | 1.77 (1.24-2.80)  | 0.094 |
| <b>Oxygen supply after extubation</b>                  |                   |                   |       |
| Nasal CPAP, n (%)                                      | 11 (45.8%)        | 21 (20%)          | 0.025 |
| HFNC, n (%)                                            | 13 (54.2%)        | 84 (80%)          |       |
| <b>Outcome</b>                                         |                   |                   |       |
| BPD severity                                           |                   |                   | 0.000 |
| None                                                   | 0                 | 47 (44.8%)        |       |
| Mild, n (%)                                            | 6 (25%)           | 29 (27.6%)        |       |
| Moderate, n (%)e                                       | 4 (16.7%)         | 18 (17.1%)        |       |
| Severe, n (%)                                          | 14 (58.3%)        | 11 (10.5%)        |       |
| IVH, n (%)                                             | 2 (8.3)           | 4 (3.8%)          | 0.432 |

|                                                    |                    |                    |       |
|----------------------------------------------------|--------------------|--------------------|-------|
| ROP, n (%)                                         | 12 (50%)           | 26 (24.8%)         | 0.043 |
| Duration of oxygen supply, days,<br>median (IQR)   | 92.9 (48-275)      | 47.0 (27-110)      | 0.000 |
| Tracheostomy, n (%)                                | 1 (4.2%)           | 0                  | 0.049 |
| Home oxygen, n (%)                                 | 3 (12.5%)          | 1 (0.9%)           | 0.006 |
| HD at discharge, days, median<br>(IQR)             | 103.4 (57-254)     | 64.6 (31-193)      | 0.000 |
| Corrected age at discharge, weeks,<br>median (IQR) | 42.5 (37-64)       | 38.6 (35.7-53.4)   | 0.001 |
| Body weight at discharge, grams,<br>median (IQR)   | 3209.2 (2200-6150) | 2812.1 (2070-4350) | 0.043 |

#### **Maternal and prenatal care information**

|                          |              |              |       |
|--------------------------|--------------|--------------|-------|
| Age, median (IQR)        | 33.8 (26-41) | 34.0 (22-41) | 0.862 |
| Chorioamnionitis, n, (%) | 10 (41.7%)   | 33 (31.4%)   | 0.817 |
| PROM, n (%)              | 7 (29.2%)    | 40 (38.1%)   | 0.016 |
| Antenatal steroid        | 0.71 (0-1)   | 0.92 (0-2)   | 0.455 |

---

BPD, bronchopulmonary dysplasia; CPAP, continuous positive airway pressure; HD, hospital day, HFNC, high-flow nasal cannula; IVH, intraventricular hemorrhage; PDA, patent ductus arteriosus; PPHN, pulmonary hypertension of newborn; PROM, premature rupture of membrane; ROP, retinopathy of prematurity; RSS, respiratory severity score  
Values are shown as n (%), mean (standard deviation), or median (interquartile range)
